# Supplementary material for: Increased PINK1 Confers a Neuroprotective Role After Glutamate Excitotoxicity in Neuronal Cells
Source: Research Square preprint supplement (doi:10.21203/rs.3.rs-736719/v1), 2021-07-26
Supplement: Supplementary file 1 [file 76427ea6fccc8f073c5064f0.docx]

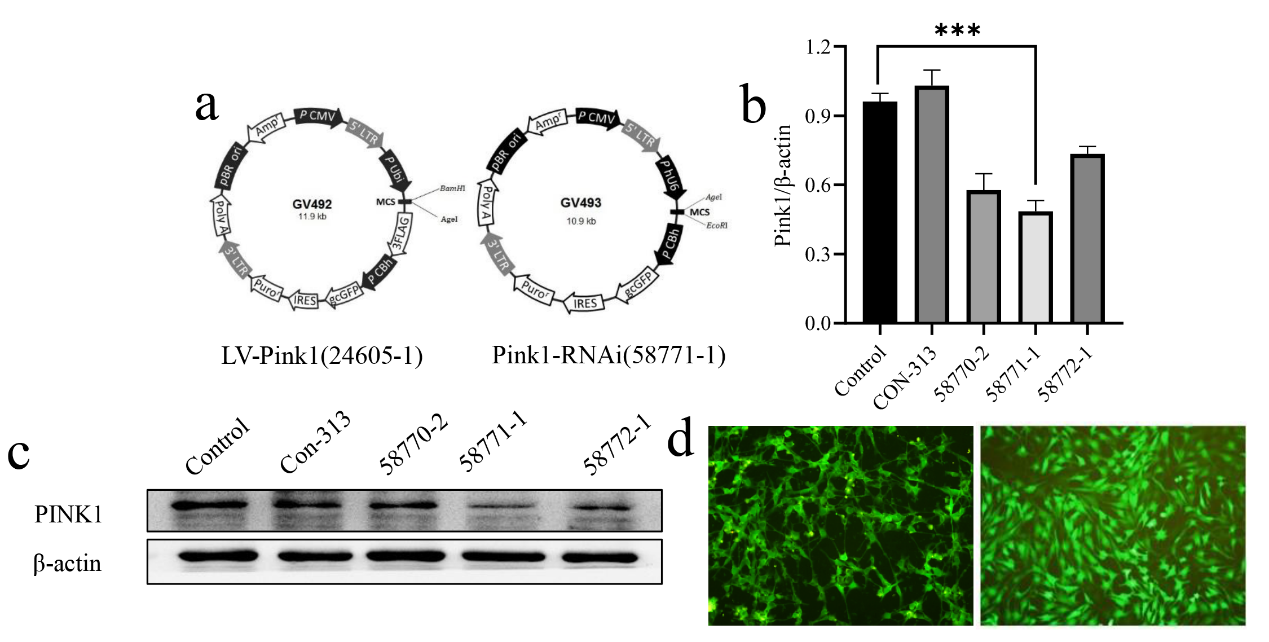


**Fig. S** Validation of transfection efficiency of PINK1 lentivirus into HT22 cells. **a.** LV- PINK1 vector (gv492), PINK1-RNAi vector (gv493); **b.** PINK1-RNAi transcription was detected by q-PCR, *: p < 0.05; **c.** PINK1-RNAi translation level was detected by Western blot; **d.** The transfection efficiency of PINK1 was detected by immunofluorescence staining (left Infection with lv-pink1; right: Infection with PINK1 RNAi (58771-1))
